# Supplementary material for: Community Nurse-Paramedics' Sphere of Practice in Primary Care; an ethnographic study
Source: Research Square preprint supplement (doi:10.21203/rs.3.rs-63965/v1), 2020-11-06
Supplement: Supplementary file 1 [file 1db9732a5c5b62320b0f4f69.docx]

Consolidated criteria for reporting qualitative studies (COREQ): 32-item checklist 24.9.2020

Tuija Rasku

Domain 1: Research team and reflexivity

1. Tuija Rasku/ the corresponding author has done the interviews. Reported on Page 1, after the Headline.
2. Credentials: MHSc., PhD researcher Reported on Page 1, after Headline.
3. Senior lecture of nursing
4. female
5. Master and Phd studies of qualitative studies, teacher of qualitative studies for nurses

Relationship with participants

1. From 24 interviewed; purposive sampling Reported on Page 4, Participants.
2. Participants were informed about the research and their voluntarily participated Reported on Page 4, Participants.
3. The reasons and interests in the research topic; Reported on Page 4, participants.

Domain 2: study design

Theoretical framework

1. Ethnography; Reported on Page 3, Methodology.

Participant selection

1. It was purposive sampling. In Finland there a very few community nurse-paramedics so all community nurse-paramedics from these three hospital districts were invited to come along and all were positively ready to join. Reported on Page 4, Participants.
2. They were approached by email, by telephone and face-to-face. Reported on Page 4, Participants.
3. 24 totally; Reported on page 4, Participants.
4. No-one refused or were dropped out. All the time the atmosphere was very positive. Reported on Page 4, Participants.

Setting

1. In units, at workplaces. Reported on page 5, Data collection.
2. Only the participant and the interviewer spent the time together. Reported on page 5, Data collection.
3. Authenticity, observation; field notes and interviews. Reported on page 5, Data collection.

Data collection

1. It was pilot tested and there was a question guide for help if needed. Most of the time there was no need for the guide because the participants were happy to tell about their thoughts. Reported on page 5-6, Data collection.
2. Non repeated interviews were needed. Reported on page 6, Data collection.
3. When the interviews were done in unit while driving from one patient to another the researcher did notes. Two of the interviews were recorded. Reported on page 6, Data collection.
4. All time and there are hundreds of pages. Reported on page 6, Data collection.
5. Sometimes it took all shift (10-12 hours) but those “in office”-took proximately two hours. Reported on page 5, Data collection.
6. Yes, it was discussed about the data saturation. Reported on page 6, Data collection.
7. Yes, during the next shift we went through about those transcripts and if there was a need to do any corrections. Happily, very rarely the researcher has understood wrongly. Reported on page 5, Data collection.

Domain 3. analysis and findings

Data analysis.

1. Three coders. Reported on page 7, Data analysis.
2. There is an example data extracts demonstrating the hierarchical coding process. Reported on page 7, Data analysis.
3. The themes were derived from the data. Reported on page 7, Data analysis.
4. There was no software used. Reported on page 7, Data analysis.
5. Yes. Reported on page 7, Data analysis.

Reporting

1. Yes, there are quotations presented. Because there were not so many participants the participant does not have number. The quotations have numbers. Reported on page 8, Results.
2. It was consistent. Reported on pages 7-18, Results and Discussion.
3. Yes, they are presented. Reported on pages 7-18, Results and Discussion.
4. Yes, there are. Reported on pages 7-18, Results and Discussion.
